# Supplementary material for: Dupilumab Improves Skin Barrier Function in Adults with Atopic Dermatitis: A Prospective Observational Study
Source: MDPI journal article supplement (doi:10.3390/jcm11123341), 2022-06-10
Supplement: s1 [file s1]

## Supplementary Materials

**Table S1.** Changes in clinical scores between groups.

|               | Topical corticosteroids<br>(n = 10) |                |                   |              | Cyclosporine<br>(n = 14) |                 |                    |              | Dupilumab<br>(n = 22) |                 |                    |              | P-<br>value# |
|---------------|-------------------------------------|----------------|-------------------|--------------|--------------------------|-----------------|--------------------|--------------|-----------------------|-----------------|--------------------|--------------|--------------|
|               | Baseline<br>(n = 10)                | End<br>(n = 9) | Change<br>(n = 9) | P-<br>value* | Baseline<br>(n = 14)     | End<br>(n = 12) | Change<br>(n = 12) | P-<br>value* | Baseline<br>(n = 22)  | End<br>(n = 21) | Change<br>(n = 21) | P-<br>value* |              |
| <b>EASI</b>   | 11.72 (3.91)                        | 4.54 (2.20)    | -7.05             | 0.008        | 15.04 (4.09)             | 11.21 (8.67)    | -5.14              | 0.092        | 24.60 (5.36)          | 7.07 (4.33)     | -17.50             | <0.001       | <0.001       |
| <b>SCORAD</b> | 37.28 (12.11)                       | 24.33 (13.15)  | -12.79            | 0.073        | 47.41 (9.43)             | 32.93 (20.64)   | -15.69             | 0.03         | 57.30 (13.83)         | 27.29 (10.38)   | -29.26             | <0.001       | 0.026        |
| <b>DLQI</b>   | 12.20 (6.20)                        | 9.38 (5.01)    | -3.75             | 0.195        | 9.29 (4.05)              | 6.11 (4.57)     | -2.56              | 0.196        | 17.59 (7.28)          | 5.19 (4.62)     | -12.52             | <0.001       | 0.002        |
| <b>BSA</b>    | 14.23 (5.31)                        | 7.68 (4.51)    | -6.33             | 0.006        | 22.63 (7.96)             | 19.26 (17.39)   | -6.61              | 0.234        | 39.54 (18.47)         | 17.18 (12.24)   | -21.94             | <0.001       | 0.012        |
| <b>IGA</b>    | 2.50 (0.53)                         | 1.25 (0.46)    | -1.13             | 0.002        | 3.21 (0.58)              | 2.33 (1.11)     | -1.00              | 0.028        | 3.73 (0.46)           | 1.90 (0.70)     | -1.81              | <0.001       | 0.022        |

Data are expressed as mean (standard deviation).

BSA, body surface area; DLQI, Dermatology Life Quality Index; EASI, Eczema Area Severity Index; IGA, Investigator Global Assessment scale; SCORAD, SCORing Atopic Dermatitis.

\*P-value after using Student's t-test for paired samples to compare scores at baseline and after follow-up.

#P-value after using one-way independent ANOVA test to compare scores between different treatments (topical corticosteroids, cyclosporine and dupilumab).

**Table S2.** Changes in barrier function parameters after each treatment and between groups.

| Skin homeostasis parameters                | Topical corticosteroids (n = 10) |               |                |                  | Cyclosporine (n = 14) |               |                 |                  | Dupilumab (n = 22) |               |                 |                  | Differences between treatments |  |
|--------------------------------------------|----------------------------------|---------------|----------------|------------------|-----------------------|---------------|-----------------|------------------|--------------------|---------------|-----------------|------------------|--------------------------------|--|
|                                            | Baseline (n = 10)                | End (n = 9)   | Change (n = 9) | <i>P-value</i> * | Baseline (n = 14)     | End (n = 12)  | Change (n = 12) | <i>P-value</i> * | Baseline (n = 22)  | End (n = 21)  | Change (n = 21) | <i>P-value</i> * | <i>P-value</i> #               |  |
| On eczematous lesions                      |                                  |               |                |                  |                       |               |                 |                  |                    |               |                 |                  |                                |  |
| TEWL (g·h <sup>-1</sup> ·m <sup>-2</sup> ) | 25.30 (10.59)                    | 14.88 (3.41)  | -10.43         | 0.047            | 23.51 (9.88)          | 15.79 (6.75)  | -7.73           | 0.089            | 31.02 (16.93)      | 12.10 (5.05)  | -18.93          | <0.001           | 0.128                          |  |
| Temperature (°C)                           | 31.54 (1.46)                     | 32 (1.06)     | +0.46          | 0.257            | 32.35 (1.13)          | 32.74 (0.46)  | +0.49           | 0.316            | 32.53 (1.08)       | 31.64 (1.56)  | -0.82           | 0.009            | 0.013                          |  |
| SCH (AU)                                   | 18.24 (12.53)                    | 40.79 (13.86) | +22.54         | 0.010            | 27.78 (15.05)         | 34.36 (17.79) | +2.85           | 0.986            | 19.93 (9.71)       | 37.73 (15.59) | +19.18          | <0.001           | 0.029                          |  |
| pH                                         | 6.82 (0.50)                      | 6.77 (0.57)   | -0.04          | 0.902            | 6.12 (0.52)           | 6.37 (0.68)   | +0.86           | 0.064            | 6.56 (0.80)        | 6.45 (0.67)   | -0.12           | 0.641            | 0.177                          |  |
| On non-lesioned skin                       |                                  |               |                |                  |                       |               |                 |                  |                    |               |                 |                  |                                |  |
| TEWL (g·h <sup>-1</sup> ·m <sup>-2</sup> ) | 9.35 (3.06)                      | 9.49 (3.92)   | +0.14          | 0.940            | 10.83 (4.54)          | 9.23 (2.69)   | -1.60           | 0.257            | 11.87 (4.77)       | 8.25 (2.15)   | -3.62           | 0.006            | 0.159                          |  |
| Temperature (°C)                           | 30.83 (1.58)                     | 31.26 (0.99)  | +0.44          | 0.227            | 31.25 (1.25)          | 31.70 (0.84)  | +0.61           | 0.306            | 31.18 (1.28)       | 30.47 (1.48)  | -0.63           | 0.094            | 0.083                          |  |
| SCH (AU)                                   | 39.94 (9.21)                     | 46.40 (10.61) | +6.46          | 0.061            | 38.23 (12.85)         | 39.09 (11.46) | +0.05           | 0.620            | 32.68 (12.59)      | 41.68 (10.63) | +11.41          | <0.001           | 0.033                          |  |
| pH                                         | 6.34 (0.66)                      | 6.77 (0.89)   | +1.81          | 0.421            | 6.07 (0.54)           | 6.49 (0.65)   | +0.99           | 0.021            | 6.57 (0.76)        | 6.58 (0.65)   | -0.02           | 0.953            | 0.173                          |  |

Data are expressed as mean (standard deviation).

AU, arbitrary units; SCH, Stratum Corneum Hydration; TEWL, Transepidermal Water Loss.

\**P-value* after using Student's t-test for paired samples to compare parameters at baseline and after follow-up.

#*P-value* after using the one-way independent ANOVA test to compare changes in skin homeostasis parameters between different treatments (topical corticosteroids, cyclosporine and dupilumab)

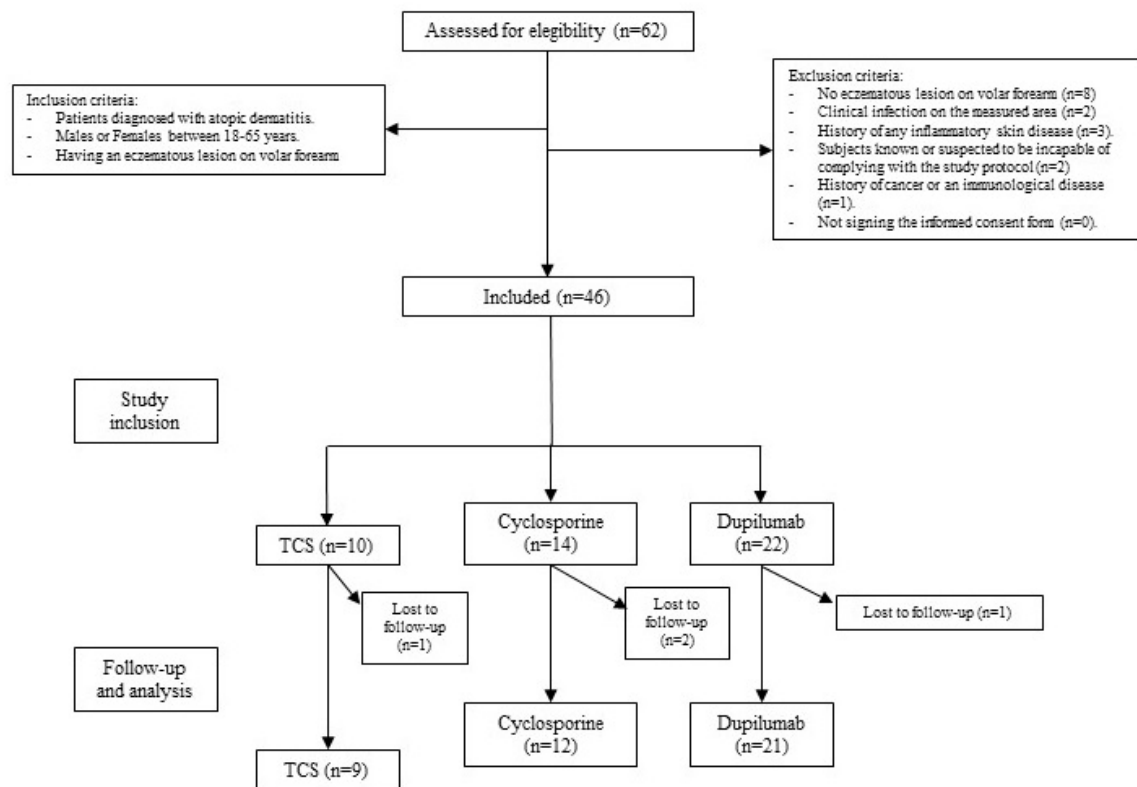

**Figure S1.** Participant flow chart
